# Supplementary material for: Asn47 and Phe114 modulate the inner sphere reorganization energies of type zero copper proteins
Source: Royal Society of Chemistry journal article supplement (doi:10.1039/c6cp00747c), 2016-01-01
Supplement: c6cp00747c1.pdf [file c6cp00747c1.pdf]

**SUPPORTING INFORMATION**

**Figure S1. Highest occupied molecular orbital (M06-2X functional) of reduced copper proteins.**

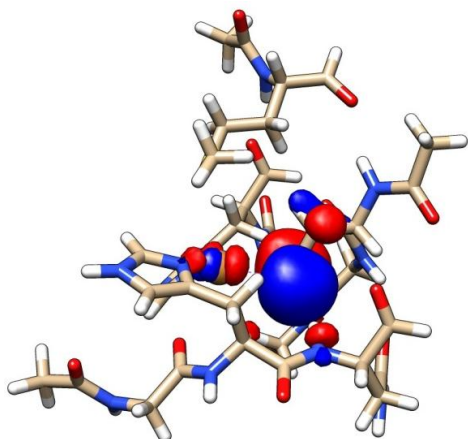

**(a) Native**

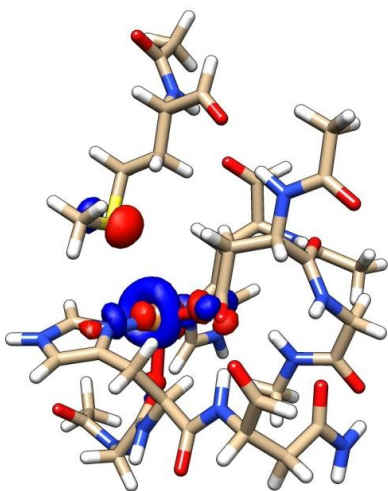

**(b) Cys112Asp**

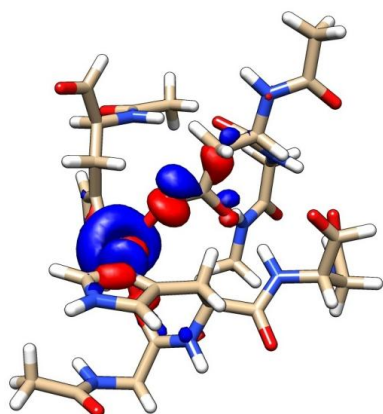

**(c) Cys112Asp/Met121Leu**

Table S1. Computed Mülliken Spin populations (a.u) of synthetic models at the copper centre using different functionals

| <b>Method</b>                | $[\text{Cu}(\text{NCS})_2]^0$ | $[\text{Cu}(\text{SCH}_3)_2]^0$ |
|------------------------------|-------------------------------|---------------------------------|
| BP86/B2//BP86/B1             | 0.193                         | 0.212                           |
| B3LYP/B2//B3LYP/B1           | 0.206                         | 0.224                           |
| B3LYP-D3BJ/B2//B3LYP-D3BJ/B1 | 0.206                         | 0.224                           |
| M06-L/B2//M06-L/B1           | 0.231                         | 0.245                           |
| M06-2X/B2//M06-2X/B1         | 0.610                         | 0.524                           |

Table S2. Computed Mülliken Spin populations (a.u) of big models of copper proteins at the copper centre using M06-2X functional.

| <b>Method</b>       | M06-2X | QM/MM <sup>29</sup> |
|---------------------|--------|---------------------|
| Native              | 0.728  | 0.508               |
| Cys112Asp           | 0.805  | 0.670               |
| Cys112Asp/Met121Leu | 0.824  | 0.643               |
